# Supplementary material
Source: PubMed Central journal article supplement (PMC4492551)
Supplement: Supp_Table1.pdf [file Supp_Table1.pdf]

**Supplemental Table S1.** Map positions of PB insertions

| <b>sample</b> | <b>group</b>               | <b>chrom</b> | <b>address<sup>1</sup></b> | <b>max read #<sup>2</sup></b> |
|---------------|----------------------------|--------------|----------------------------|-------------------------------|
| Ad129         | Ad-T/mCherry only          | chr6         | 6365032                    | 123                           |
| Ad130         | Ad-T/mCherry + AAV-hyPBase | chr10        | 121490188                  | 17001                         |
| Ad130         | Ad-T/mCherry + AAV-hyPBase | chr9         | 78002056                   | 16518                         |
| Ad130         | Ad-T/mCherry + AAV-hyPBase | chr10        | 14708636                   | 16475                         |
| Ad130         | Ad-T/mCherry + AAV-hyPBase | chr6         | 29541349                   | 15181                         |
| Ad130         | Ad-T/mCherry + AAV-hyPBase | chrX         | 36807243                   | 14737                         |
| Ad130         | Ad-T/mCherry + AAV-hyPBase | chr13        | 81334639                   | 13162                         |
| Ad130         | Ad-T/mCherry + AAV-hyPBase | chr9         | 66199770                   | 13038                         |
| Ad130         | Ad-T/mCherry + AAV-hyPBase | chr5         | 65634194                   | 12379                         |
| Ad130         | Ad-T/mCherry + AAV-hyPBase | chr2         | 142786169                  | 11317                         |
| Ad130         | Ad-T/mCherry + AAV-hyPBase | chr12        | 84616944                   | 10241                         |
| Ad130         | Ad-T/mCherry + AAV-hyPBase | chr16        | 76356771                   | 10197                         |
| Ad130         | Ad-T/mCherry + AAV-hyPBase | chr1         | 128218943                  | 9644                          |
| Ad130         | Ad-T/mCherry + AAV-hyPBase | chrX         | 169320998                  | 9173                          |
| Ad130         | Ad-T/mCherry + AAV-hyPBase | chrX         | 113184906                  | 7621                          |
| Ad130         | Ad-T/mCherry + AAV-hyPBase | chr6         | 38623212                   | 7339                          |
| Ad130         | Ad-T/mCherry + AAV-hyPBase | chr18        | 38298807                   | 6736                          |
| Ad130         | Ad-T/mCherry + AAV-hyPBase | chr15        | 57696498                   | 6640                          |
| Ad130         | Ad-T/mCherry + AAV-hyPBase | chr3         | 98759134                   | 6630                          |
| Ad130         | Ad-T/mCherry + AAV-hyPBase | chr4         | 108832803                  | 6139                          |
| Ad130         | Ad-T/mCherry + AAV-hyPBase | chr1         | 187729721                  | 6022                          |
| Ad130         | Ad-T/mCherry + AAV-hyPBase | chr17        | 38392120                   | 5109                          |
| Ad130         | Ad-T/mCherry + AAV-hyPBase | chr16        | 38100649                   | 4826                          |
| Ad130         | Ad-T/mCherry + AAV-hyPBase | chr7         | 47495754                   | 4671                          |
| Ad130         | Ad-T/mCherry + AAV-hyPBase | chr11        | 97315062                   | 4391                          |
| Ad130         | Ad-T/mCherry + AAV-hyPBase | chr16        | 33277764                   | 4222                          |
| Ad130         | Ad-T/mCherry + AAV-hyPBase | chr14        | 30720194                   | 3775                          |
| Ad130         | Ad-T/mCherry + AAV-hyPBase | chr19        | 56519985                   | 3608                          |
| Ad130         | Ad-T/mCherry + AAV-hyPBase | chr3         | 32454486                   | 3359                          |
| Ad130         | Ad-T/mCherry + AAV-hyPBase | chr12        | 79350818                   | 3223                          |
| Ad130         | Ad-T/mCherry + AAV-hyPBase | chr4         | 102578121                  | 3194                          |
| Ad130         | Ad-T/mCherry + AAV-hyPBase | chr15        | 83167459                   | 2673                          |
| Ad130         | Ad-T/mCherry + AAV-hyPBase | chr10        | 94060646                   | 2451                          |
| Ad130         | Ad-T/mCherry + AAV-hyPBase | chr8         | 33384124                   | 2427                          |
| Ad130         | Ad-T/mCherry + AAV-hyPBase | chr12        | 94397741                   | 2100                          |
| Ad130         | Ad-T/mCherry + AAV-hyPBase | chr11        | 116030953                  | 1986                          |
| Ad130         | Ad-T/mCherry + AAV-hyPBase | chr13        | 108045379                  | 1852                          |
| Ad130         | Ad-T/mCherry + AAV-hyPBase | chr5         | 86924799                   | 1719                          |
| Ad130         | Ad-T/mCherry + AAV-hyPBase | chr13        | 38565476                   | 1669                          |

**Supplemental Table S1.** Map positions of PB insertions

| <b>sample</b> | <b>group</b>               | <b>chrom</b> | <b>address<sup>1</sup></b> | <b>max read #<sup>2</sup></b> |
|---------------|----------------------------|--------------|----------------------------|-------------------------------|
| Ad130         | Ad-T/mCherry + AAV-hyPBase | chr5         | 73254283                   | 1273                          |
| Ad130         | Ad-T/mCherry + AAV-hyPBase | chr16        | 46011645                   | 1043                          |
| Ad130         | Ad-T/mCherry + AAV-hyPBase | chr4         | 150872748                  | 964                           |
| Ad130         | Ad-T/mCherry + AAV-hyPBase | chr9         | 24137727                   | 819                           |
| Ad130         | Ad-T/mCherry + AAV-hyPBase | chr16        | 35495575                   | 726                           |
| Ad130         | Ad-T/mCherry + AAV-hyPBase | chr19        | 38365398                   | 715                           |
| Ad130         | Ad-T/mCherry + AAV-hyPBase | chr18        | 39485547                   | 687                           |
| Ad130         | Ad-T/mCherry + AAV-hyPBase | chrX         | 147130129                  | 495                           |
| Ad130         | Ad-T/mCherry + AAV-hyPBase | chr2         | 176152819                  | 491                           |
| Ad130         | Ad-T/mCherry + AAV-hyPBase | chr2         | 175470634                  | 490                           |
| Ad130         | Ad-T/mCherry + AAV-hyPBase | chr2         | 178077843                  | 485                           |
| Ad130         | Ad-T/mCherry + AAV-hyPBase | chr2         | 176927177                  | 484                           |
| Ad130         | Ad-T/mCherry + AAV-hyPBase | chr2         | 175275709                  | 477                           |
| Ad130         | Ad-T/mCherry + AAV-hyPBase | chr2         | 176521625                  | 475                           |
| Ad130         | Ad-T/mCherry + AAV-hyPBase | chr2         | 177897762                  | 475                           |
| Ad130         | Ad-T/mCherry + AAV-hyPBase | chr1         | 191880969                  | 474                           |
| Ad130         | Ad-T/mCherry + AAV-hyPBase | chr2         | 175141417                  | 473                           |
| Ad130         | Ad-T/mCherry + AAV-hyPBase | chr2         | 175703074                  | 466                           |
| Ad130         | Ad-T/mCherry + AAV-hyPBase | chr2         | 175800450                  | 465                           |
| Ad130         | Ad-T/mCherry + AAV-hyPBase | chr2         | 176799228                  | 465                           |
| Ad130         | Ad-T/mCherry + AAV-hyPBase | chr2         | 175373083                  | 463                           |
| Ad130         | Ad-T/mCherry + AAV-hyPBase | chr2         | 177465356                  | 462                           |
| Ad130         | Ad-T/mCherry + AAV-hyPBase | chr2         | 177759887                  | 454                           |
| Ad130         | Ad-T/mCherry + AAV-hyPBase | chr2         | 175930476                  | 453                           |
| Ad130         | Ad-T/mCherry + AAV-hyPBase | chr2         | 177001556                  | 453                           |
| Ad130         | Ad-T/mCherry + AAV-hyPBase | chr2         | 176424240                  | 442                           |
| Ad130         | Ad-T/mCherry + AAV-hyPBase | chr2         | 177546523                  | 442                           |
| Ad130         | Ad-T/mCherry + AAV-hyPBase | chr2         | 177236326                  | 439                           |
| Ad130         | Ad-T/mCherry + AAV-hyPBase | chr2         | 175605525                  | 435                           |
| Ad130         | Ad-T/mCherry + AAV-hyPBase | chr2         | 176671171                  | 434                           |
| Ad130         | Ad-T/mCherry + AAV-hyPBase | chr2         | 176227198                  | 429                           |
| Ad130         | Ad-T/mCherry + AAV-hyPBase | chr2         | 177397709                  | 421                           |
| Ad130         | Ad-T/mCherry + AAV-hyPBase | chr4         | 150425154                  | 219                           |
| Ad130         | Ad-T/mCherry + AAV-hyPBase | chr2         | 103485997                  | 210                           |
| Ad130         | Ad-T/mCherry + AAV-hyPBase | chr7         | 50383851                   | 196                           |
| Ad130         | Ad-T/mCherry + AAV-hyPBase | chr3         | 146579019                  | 192                           |
| Ad130         | Ad-T/mCherry + AAV-hyPBase | chr1         | 67104222                   | 147                           |
| Ad130         | Ad-T/mCherry + AAV-hyPBase | chr14        | 114074976                  | 93                            |
| Ad130         | Ad-T/mCherry + AAV-hyPBase | chr11        | 63702560                   | 65                            |

**Supplemental Table S1.** Map positions of PB insertions

| <b>sample</b> | <b>group</b>               | <b>chrom</b> | <b>address<sup>1</sup></b> | <b>max read #<sup>2</sup></b> |
|---------------|----------------------------|--------------|----------------------------|-------------------------------|
| Ad130         | Ad-T/mCherry + AAV-hyPBase | chr5         | 77133203                   | 63                            |
| Ad130         | Ad-T/mCherry + AAV-hyPBase | chr17        | 92106796                   | 56                            |
| Ad130         | Ad-T/mCherry + AAV-hyPBase | chr11        | 98215121                   | 53                            |
| Ad131         | Ad-T/mCherry + AAV-hyPBase | chr13        | 18832929                   | 57545                         |
| Ad131         | Ad-T/mCherry + AAV-hyPBase | chr14        | 101905932                  | 48623                         |
| Ad131         | Ad-T/mCherry + AAV-hyPBase | chr15        | 69062102                   | 32580                         |
| Ad131         | Ad-T/mCherry + AAV-hyPBase | chr16        | 33953256                   | 31701                         |
| Ad131         | Ad-T/mCherry + AAV-hyPBase | chr5         | 140152426                  | 19726                         |
| Ad131         | Ad-T/mCherry + AAV-hyPBase | chr6         | 39076120                   | 16061                         |
| Ad131         | Ad-T/mCherry + AAV-hyPBase | chr19        | 32331678                   | 11317                         |
| Ad131         | Ad-T/mCherry + AAV-hyPBase | chr5         | 123182349                  | 10884                         |
| Ad131         | Ad-T/mCherry + AAV-hyPBase | chr7         | 65693856                   | 8337                          |
| Ad131         | Ad-T/mCherry + AAV-hyPBase | chr3         | 87593175                   | 6907                          |
| Ad131         | Ad-T/mCherry + AAV-hyPBase | chr6         | 132738069                  | 4363                          |
| Ad131         | Ad-T/mCherry + AAV-hyPBase | chr19        | 20515743                   | 3924                          |
| Ad131         | Ad-T/mCherry + AAV-hyPBase | chr13        | 104226809                  | 3199                          |
| Ad131         | Ad-T/mCherry + AAV-hyPBase | chr12        | 69371229                   | 2264                          |
| Ad131         | Ad-T/mCherry + AAV-hyPBase | chr2         | 104129678                  | 1857                          |
| Ad131         | Ad-T/mCherry + AAV-hyPBase | chr7         | 73540039                   | 1388                          |
| Ad131         | Ad-T/mCherry + AAV-hyPBase | chr3         | 87860004                   | 986                           |
| Ad131         | Ad-T/mCherry + AAV-hyPBase | chr6         | 29585019                   | 454                           |
| Ad131         | Ad-T/mCherry + AAV-hyPBase | chr3         | 34736584                   | 231                           |
| Ad131         | Ad-T/mCherry + AAV-hyPBase | chr10        | 21355632                   | 164                           |
| Ad131         | Ad-T/mCherry + AAV-hyPBase | chr8         | 63319085                   | 117                           |
| Ad131         | Ad-T/mCherry + AAV-hyPBase | chr3         | 130675984                  | 96                            |
| Ad131         | Ad-T/mCherry + AAV-hyPBase | chr12        | 90510024                   | 94                            |
| Ad131         | Ad-T/mCherry + AAV-hyPBase | chr5         | 23845034                   | 82                            |
| Ad131         | Ad-T/mCherry + AAV-hyPBase | chr2         | 84275652                   | 69                            |
| Ad132         | Ad-T/mCherry + AAV-hyPBase | chr3         | 106513780                  | 36001                         |
| Ad132         | Ad-T/mCherry + AAV-hyPBase | chr14        | 48156268                   | 33969                         |
| Ad132         | Ad-T/mCherry + AAV-hyPBase | chr11        | 116167327                  | 20853                         |
| Ad132         | Ad-T/mCherry + AAV-hyPBase | chr5         | 32851244                   | 20555                         |
| Ad132         | Ad-T/mCherry + AAV-hyPBase | chr9         | 70262987                   | 17803                         |
| Ad132         | Ad-T/mCherry + AAV-hyPBase | chr8         | 47893328                   | 14201                         |
| Ad132         | Ad-T/mCherry + AAV-hyPBase | chr16        | 65909388                   | 13482                         |
| Ad132         | Ad-T/mCherry + AAV-hyPBase | chr10        | 40475827                   | 12752                         |
| Ad132         | Ad-T/mCherry + AAV-hyPBase | chr3         | 148963857                  | 12551                         |
| Ad132         | Ad-T/mCherry + AAV-hyPBase | chr5         | 87568586                   | 12516                         |
| Ad132         | Ad-T/mCherry + AAV-hyPBase | chr15        | 39810153                   | 12145                         |

**Supplemental Table S1.** Map positions of PB insertions

| <b>sample</b> | <b>group</b>               | <b>chrom</b> | <b>address<sup>1</sup></b> | <b>max read #<sup>2</sup></b> |
|---------------|----------------------------|--------------|----------------------------|-------------------------------|
| Ad132         | Ad-T/mCherry + AAV-hyPBase | chr13        | 41231930                   | 9650                          |
| Ad132         | Ad-T/mCherry + AAV-hyPBase | chr18        | 13655949                   | 9065                          |
| Ad132         | Ad-T/mCherry + AAV-hyPBase | chr15        | 59036577                   | 8069                          |
| Ad132         | Ad-T/mCherry + AAV-hyPBase | chr3         | 53475843                   | 6152                          |
| Ad132         | Ad-T/mCherry + AAV-hyPBase | chr18        | 12956257                   | 5174                          |
| Ad132         | Ad-T/mCherry + AAV-hyPBase | chr2         | 36129789                   | 1917                          |
| Ad132         | Ad-T/mCherry + AAV-hyPBase | chr17        | 35861117                   | 1892                          |
| Ad132         | Ad-T/mCherry + AAV-hyPBase | chr9         | 74871105                   | 1824                          |
| Ad132         | Ad-T/mCherry + AAV-hyPBase | chr9         | 108760070                  | 1322                          |
| Ad132         | Ad-T/mCherry + AAV-hyPBase | chr11        | 78751811                   | 1146                          |
| Ad132         | Ad-T/mCherry + AAV-hyPBase | chr12        | 24686482                   | 853                           |
| Ad132         | Ad-T/mCherry + AAV-hyPBase | chr4         | 82622319                   | 810                           |
| Ad132         | Ad-T/mCherry + AAV-hyPBase | chr6         | 87038664                   | 780                           |
| Ad132         | Ad-T/mCherry + AAV-hyPBase | chr7         | 114192617                  | 566                           |
| Ad132         | Ad-T/mCherry + AAV-hyPBase | chr6         | 99312070                   | 423                           |
| Ad132         | Ad-T/mCherry + AAV-hyPBase | chr14        | 56367749                   | 301                           |
| Ad132         | Ad-T/mCherry + AAV-hyPBase | chr8         | 11476122                   | 231                           |
| Ad132         | Ad-T/mCherry + AAV-hyPBase | chr6         | 22141796                   | 153                           |

<sup>1</sup> Map position on mm10 mouse reference genome

<sup>2</sup> Maximum read number obtained from either left or right inverted repeat
